# Supplementary material for: Galectin-9 Controls CD40 Signaling through a Tim-3 Independent Mechanism and Redirects the Cytokine Profile of Pathogenic T Cells in Autoimmunity
Source: PubMed Central journal article supplement (PMC3369903; doi:10.1371/journal.pone.0038708), 2012-06-07
Supplement: pone.0038708.s001.pdf [file pone.0038708.s001.pdf]

Figure S1.

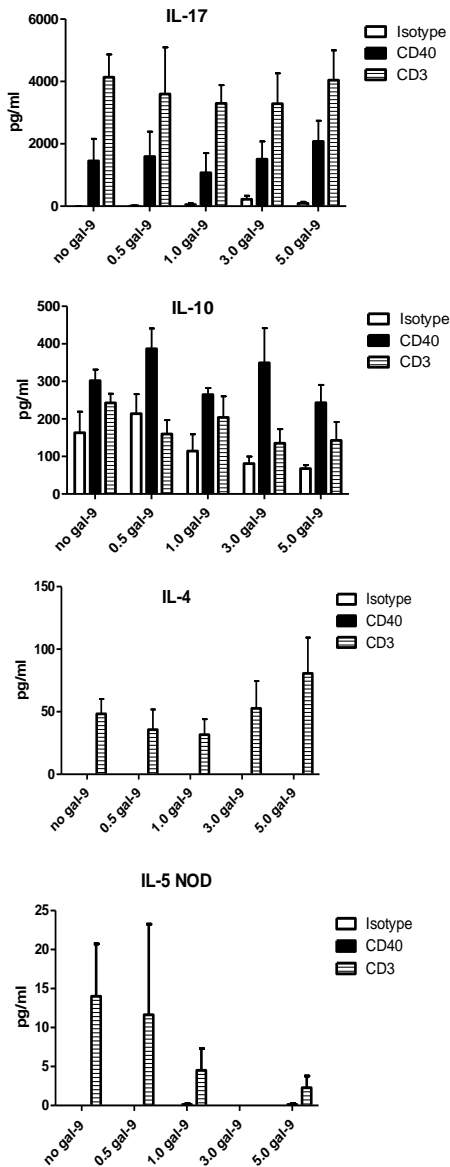

**Figure S1. CD40 and CD3 induced cytokine phenotypes differ.**

CD4<sup>lo</sup>CD4<sup>+</sup> T cells were sorted from 7-20 weeks old female NOD spleens. Cells were either CD40- or CD3-stimulated in the absence/presence of indicated concentrations of galectin-9 (gal-9; ug/ml) for 3 days then cytokines were measured. Bar graphs depict means with SEM. Measurements were done on four individual mice of different ages.
